# Supplementary material for: Late Devonian A-Type Granites from the Beishan, Southern Central Asia Orogenic Belt: Implications for Closure of the Paleo-Asia Ocean
Source: MDPI journal article supplement (doi:10.3390/min13040565), 2023-04-18
Supplement: s1 [file s1]

**Table S1.** Results of U-Pb dating by of zircons from the Duhongshan granites.

| Spot no. | Th/U | Isotopic ratios                     |         |                                     |         | Ages (Ma)                           |     |                                     |     |
|----------|------|-------------------------------------|---------|-------------------------------------|---------|-------------------------------------|-----|-------------------------------------|-----|
|          |      | <sup>207</sup> Pb/ <sup>235</sup> U |         | <sup>206</sup> Pb/ <sup>238</sup> U |         | <sup>207</sup> Pb/ <sup>235</sup> U |     | <sup>206</sup> Pb/ <sup>238</sup> U |     |
|          |      | Ratios                              | ±1σ     | Ratios                              | ±1σ     | Age                                 | ±1σ | Age                                 | ±1σ |
| DHS11-1  | 1.79 | 0.40223                             | 0.02298 | 0.06139                             | 0.00073 | 343                                 | 17  | 384                                 | 4   |
| DHS11-2  | 1.25 | 0.41272                             | 0.01321 | 0.05923                             | 0.00073 | 351                                 | 9   | 371                                 | 4   |
| DHS11-3  | 0.93 | 0.43438                             | 0.02565 | 0.06021                             | 0.00073 | 366                                 | 18  | 377                                 | 4   |
| DHS11-4  | 0.60 | 0.49813                             | 0.00648 | 0.06043                             | 0.00073 | 410                                 | 4   | 378                                 | 4   |
| DHS11-5  | 0.65 | 0.48646                             | 0.00913 | 0.06010                             | 0.00073 | 402                                 | 6   | 376                                 | 4   |
| DHS11-6  | 0.53 | 0.41450                             | 0.02939 | 0.05993                             | 0.00073 | 352                                 | 21  | 375                                 | 4   |
| DHS11-7  | 0.63 | 0.49735                             | 0.01044 | 0.05967                             | 0.00073 | 410                                 | 7   | 374                                 | 4   |
| DHS11-8  | 0.68 | 0.48577                             | 0.00696 | 0.05972                             | 0.00073 | 402                                 | 5   | 374                                 | 4   |
| DHS11-9  | 1.37 | 0.47382                             | 0.03384 | 0.06143                             | 0.00074 | 394                                 | 23  | 384                                 | 4   |
| DHS11-10 | 0.64 | 0.40765                             | 0.00843 | 0.05985                             | 0.00073 | 347                                 | 6   | 375                                 | 4   |
| DHS11-11 | 0.52 | 0.50217                             | 0.00714 | 0.06056                             | 0.00074 | 413                                 | 5   | 379                                 | 4   |
| DHS11-12 | 0.76 | 0.41872                             | 0.00977 | 0.05942                             | 0.00074 | 355                                 | 7   | 372                                 | 5   |
| DHS11-13 | 1.32 | 0.49804                             | 0.00996 | 0.05996                             | 0.00073 | 410                                 | 7   | 375                                 | 4   |
| DHS11-14 | 0.59 | 0.48488                             | 0.00674 | 0.05947                             | 0.00074 | 401                                 | 5   | 372                                 | 5   |
| DHS11-15 | 0.65 | 0.39473                             | 0.00690 | 0.06123                             | 0.00074 | 338                                 | 5   | 383                                 | 4   |
| DSH15-1  | 0.65 | 0.48588                             | 0.00923 | 0.05971                             | 0.00073 | 402                                 | 6   | 374                                 | 4   |
| DSH15-2  | 0.65 | 0.39305                             | 0.00636 | 0.05936                             | 0.00073 | 337                                 | 5   | 372                                 | 4   |
| DSH15-3  | 0.79 | 0.40684                             | 0.01040 | 0.05928                             | 0.00073 | 347                                 | 8   | 371                                 | 4   |
| DSH15-4  | 0.63 | 0.41392                             | 0.00874 | 0.05966                             | 0.00074 | 352                                 | 6   | 374                                 | 5   |
| DSH15-5  | 0.43 | 0.41154                             | 0.00647 | 0.05933                             | 0.00073 | 350                                 | 5   | 372                                 | 4   |
| DSH15-6  | 0.31 | 0.49089                             | 0.01654 | 0.05895                             | 0.00073 | 406                                 | 11  | 369                                 | 4   |
| DSH15-7  | 0.57 | 0.44161                             | 0.01472 | 0.05956                             | 0.00078 | 371                                 | 10  | 373                                 | 5   |
| DSH15-8  | 0.49 | 0.43435                             | 0.00674 | 0.05943                             | 0.00074 | 366                                 | 5   | 372                                 | 5   |
| DSH15-9  | 0.49 | 0.38318                             | 0.00601 | 0.05949                             | 0.00074 | 329                                 | 4   | 373                                 | 5   |
| DSH15-10 | 0.43 | 0.38279                             | 0.00628 | 0.06034                             | 0.00075 | 329                                 | 5   | 378                                 | 5   |
| DSH15-11 | 0.55 | 0.39604                             | 0.00741 | 0.06040                             | 0.00087 | 339                                 | 5   | 378                                 | 5   |
| DSH15-12 | 0.61 | 0.43065                             | 0.00820 | 0.06159                             | 0.00077 | 364                                 | 6   | 385                                 | 5   |
| DSH15-13 | 0.63 | 0.45624                             | 0.00829 | 0.06076                             | 0.00076 | 382                                 | 6   | 380                                 | 5   |
| DSH15-14 | 0.42 | 0.44082                             | 0.00637 | 0.06145                             | 0.00077 | 371                                 | 4   | 384                                 | 5   |

**Table S2.** Zircon trace elements (ppm) analysis result of the Duhongshan granites.

| Spot no. | La     | Ce     | Pr    | Nd     | Sm     | Eu   | Gd     | Tb     | Dy      | Ho     | Er      | Tm     | Yb      | Lu     |
|----------|--------|--------|-------|--------|--------|------|--------|--------|---------|--------|---------|--------|---------|--------|
| DHS11-1  | 49.98  | 202.82 | 27.12 | 165.61 | 202.94 | 1.33 | 564.48 | 187.49 | 1730.70 | 473.19 | 1769.67 | 345.53 | 2929.47 | 483.27 |
| DHS11-2  | 8.25   | 57.74  | 5.29  | 29.79  | 35.67  | 0.45 | 137.48 | 58.69  | 701.24  | 238.06 | 1049.77 | 214.65 | 1935.95 | 356.89 |
| DHS11-3  | 105.25 | 298.73 | 34.29 | 158.31 | 102.87 | 0.66 | 274.55 | 116.55 | 1306.37 | 420.59 | 1713.19 | 379.85 | 3514.75 | 594.64 |
| DHS11-4  | 5.65   | 47.62  | 2.22  | 14.30  | 22.82  | 0.13 | 130.30 | 59.88  | 780.92  | 295.85 | 1327.16 | 269.83 | 2390.90 | 449.06 |
| DHS11-5  | 10.28  | 120.69 | 9.60  | 48.24  | 46.63  | 0.30 | 177.34 | 72.30  | 875.27  | 320.22 | 1402.48 | 294.97 | 2695.71 | 498.05 |
| DHS11-6  | 6.14   | 78.63  | 3.76  | 23.64  | 34.94  | 0.24 | 179.50 | 79.89  | 1039.63 | 385.96 | 1709.82 | 353.22 | 3216.03 | 608.80 |
| DHS11-7  | 3.05   | 49.13  | 2.26  | 17.28  | 43.04  | 0.04 | 150.22 | 62.44  | 761.97  | 277.39 | 1226.28 | 260.17 | 2326.12 | 430.16 |
| DHS11-8  | 4.96   | 73.65  | 7.37  | 43.20  | 29.50  | 0.16 | 118.68 | 49.49  | 607.05  | 215.98 | 965.60  | 205.49 | 1879.95 | 357.46 |
| DHS11-9  | 22.71  | 123.91 | 16.90 | 95.81  | 108.59 | 0.80 | 306.49 | 117.53 | 1307.49 | 396.43 | 1645.67 | 334.80 | 3070.71 | 537.30 |
| DHS11-10 | 1.90   | 41.95  | 1.98  | 11.79  | 25.26  | 0.13 | 118.03 | 51.81  | 632.57  | 228.48 | 1017.98 | 212.78 | 1956.26 | 376.71 |
| DHS11-11 | 3.25   | 61.48  | 2.83  | 19.12  | 31.89  | 0.17 | 169.39 | 72.91  | 919.35  | 345.32 | 1548.89 | 321.05 | 2959.79 | 563.65 |
| DHS11-12 | 6.54   | 75.51  | 5.82  | 35.50  | 37.40  | 0.29 | 141.88 | 55.72  | 671.72  | 244.78 | 1055.19 | 215.11 | 1927.98 | 367.74 |
| DHS11-13 | 8.33   | 49.10  | 4.35  | 21.21  | 14.64  | 0.27 | 53.78  | 23.61  | 283.63  | 109.71 | 492.23  | 109.34 | 1003.51 | 208.43 |
| DHS11-14 | 3.41   | 46.51  | 2.48  | 15.89  | 21.39  | 0.03 | 102.03 | 43.68  | 552.73  | 224.55 | 981.05  | 207.65 | 1915.48 | 379.25 |
| DHS11-15 | 1.29   | 40.43  | 2.02  | 11.15  | 26.68  | 0.07 | 136.57 | 57.23  | 697.15  | 259.99 | 1144.48 | 242.76 | 2333.77 | 436.11 |
| DSH15-1  | 5.55   | 68.93  | 4.20  | 34.16  | 59.60  | 0.16 | 285.01 | 110.91 | 1302.72 | 459.61 | 1938.21 | 390.71 | 3506.95 | 608.17 |
| DSH15-2  | 1.29   | 38.05  | 0.22  | 4.96   | 18.33  | 0.01 | 100.37 | 48.40  | 600.46  | 241.11 | 1111.95 | 238.00 | 2010.36 | 393.78 |
| DSH15-3  | 6.25   | 53.34  | 4.70  | 24.59  | 35.17  | 0.13 | 140.82 | 57.11  | 675.88  | 240.90 | 1059.95 | 221.33 | 2124.55 | 375.23 |
| DSH15-4  | 4.50   | 62.53  | 6.47  | 35.37  | 41.85  | 0.22 | 156.56 | 67.17  | 765.17  | 283.69 | 1236.07 | 263.62 | 2444.13 | 439.32 |
| DSH15-5  | 3.10   | 27.13  | 2.45  | 18.14  | 45.41  | 0.14 | 289.38 | 133.26 | 1421.47 | 465.65 | 1910.85 | 408.49 | 3412.28 | 619.66 |
| DSH15-6  | 28.06  | 76.43  | 12.07 | 72.63  | 94.53  | 0.09 | 312.63 | 94.44  | 995.11  | 316.94 | 1376.30 | 294.66 | 2920.13 | 558.79 |
| DSH15-7  | 0.00   | 15.01  | 0.01  | 0.80   | 1.73   | 0.29 | 14.98  | 5.81   | 74.99   | 31.84  | 153.51  | 33.77  | 343.66  | 74.18  |
| DSH15-8  | 2.63   | 42.32  | 2.41  | 8.09   | 19.12  | 0.01 | 91.40  | 44.78  | 637.15  | 254.65 | 1231.55 | 287.38 | 2833.37 | 539.85 |
| DSH15-9  | 11.44  | 62.02  | 6.22  | 33.06  | 32.69  | 0.09 | 146.08 | 61.54  | 787.42  | 308.28 | 1400.78 | 288.30 | 2755.94 | 517.90 |
| DSH15-10 | 1.38   | 35.35  | 0.89  | 4.45   | 14.62  | 0.04 | 98.30  | 46.36  | 597.12  | 235.36 | 1067.28 | 230.71 | 2189.73 | 416.83 |
| DSH15-11 | 1.35   | 29.66  | 1.15  | 10.89  | 22.01  | 0.10 | 139.25 | 61.72  | 799.19  | 320.77 | 1436.32 | 294.36 | 2688.42 | 509.91 |
| DSH15-12 | 0.09   | 17.67  | 0.09  | 0.87   | 3.77   | 0.31 | 20.74  | 8.15   | 104.57  | 45.25  | 214.76  | 45.91  | 447.33  | 93.32  |
| DSH15-13 | 2.62   | 35.94  | 2.02  | 12.51  | 20.56  | 0.04 | 103.63 | 49.86  | 666.96  | 253.12 | 1158.91 | 255.97 | 2418.09 | 442.48 |
| DSH15-14 | 0.04   | 37.57  | 0.34  | 3.17   | 15.84  | 0.01 | 127.82 | 58.47  | 841.42  | 324.94 | 1507.83 | 317.74 | 2989.92 | 537.59 |

**Table S3.** Whole-rock major (wt.%) and trace element (ppm) analyses of the Duhongshan granites.

| Sample                                      | DHS-1 | DHS-2  | DHS-3  | DHS-4  | DHS-5  | DHS-6  | DHS-7  | DHS-8 | DHS-9  | DHS-10 | DHS-13 | DHS-14 | DHS-15 | DHS-16 |
|---------------------------------------------|-------|--------|--------|--------|--------|--------|--------|-------|--------|--------|--------|--------|--------|--------|
| Si <sub>2</sub> O                           | 68.29 | 70.86  | 71.65  | 69.01  | 69.34  | 71.27  | 76.31  | 71.09 | 72.17  | 72.53  | 73.31  | 70.38  | 73.65  | 73.01  |
| Al <sub>2</sub> O <sub>3</sub>              | 14.25 | 14.45  | 14.17  | 14.66  | 14.91  | 14.46  | 13.07  | 13.74 | 14.27  | 14.24  | 13.65  | 13.25  | 13.63  | 13.77  |
| CaO                                         | 1.08  | 1.10   | 0.91   | 1.32   | 1.50   | 1.09   | 1.27   | 0.57  | 0.66   | 0.64   | 0.63   | 0.77   | 0.66   | 0.62   |
| <sup>t</sup> Fe <sub>2</sub> O <sub>3</sub> | 1.72  | 1.18   | 1.49   | 1.37   | 1.52   | 1.22   | 1.59   | 1.26  | 1.44   | 1.36   | 0.72   | 1.48   | 1.00   | 1.28   |
| K <sub>2</sub> O                            | 6.98  | 7.13   | 6.64   | 6.82   | 6.55   | 7.20   | 4.43   | 7.39  | 7.49   | 7.65   | 7.05   | 7.24   | 7.03   | 7.35   |
| MgO                                         | 0.33  | 0.04   | 0.05   | 0.05   | 0.06   | 0.04   | 0.05   | 0.04  | 0.04   | 0.04   | 0.04   | 0.23   | 0.04   | 0.04   |
| Na <sub>2</sub> O                           | 5.47  | 5.09   | 4.59   | 5.25   | 6.12   | 5.35   | 2.77   | 4.89  | 5.20   | 4.92   | 5.36   | 4.83   | 4.52   | 4.78   |
| P <sub>2</sub> O <sub>5</sub>               | 0.30  | 0.01   | 0.01   | 0.02   | 0.02   | 0.01   | 0.01   | 0.01  | 0.01   | 0.01   | 0.01   | 0.21   | 0.01   | 0.01   |
| TiO <sub>2</sub>                            | 0.35  | 0.05   | 0.06   | 0.05   | 0.06   | 0.05   | 0.06   | 0.05  | 0.05   | 0.05   | 0.05   | 0.24   | 0.04   | 0.04   |
| MnO                                         | 0.04  | 0.03   | 0.04   | 0.04   | 0.04   | 0.03   | 0.03   | 0.02  | 0.02   | 0.01   | 0.02   | 0.02   | 0.01   | 0.02   |
| LOL                                         | 1.09  | 0.80   | 0.40   | 0.90   | 0.80   | 0.60   | 0.80   | 0.60  | 0.60   | 0.40   | 0.60   | 0.40   | 0.60   | 0.60   |
| total                                       | 99.90 | 100.73 | 100.01 | 99.48  | 100.94 | 101.32 | 100.39 | 99.64 | 101.96 | 101.86 | 101.44 | 99.04  | 101.19 | 101.51 |
| Mg <sup>#</sup>                             | 25.71 | 6.15   | 5.18   | 6.14   | 7.06   | 5.43   | 5.59   | 5.08  | 4.88   | 4.62   | 9.18   | 21.78  | 5.97   | 5.23   |
| A/NK                                        | 0.86  | 0.90   | 0.96   | 0.91   | 0.87   | 0.87   | 1.40   | 0.86  | 0.86   | 0.87   | 0.83   | 0.84   | 0.91   | 0.87   |
| A/CNK                                       | 0.77  | 0.80   | 0.86   | 0.79   | 0.75   | 0.78   | 1.12   | 0.80  | 0.80   | 0.81   | 0.78   | 0.77   | 0.84   | 0.81   |
| 10000Ga/<br>Al                              | 4.36  | 4.13   | 4.95   | 4.61   | 4.56   | 4.26   | 4.84   | 4.01  | 4.43   | 4.21   | 4.42   | 4.30   | 4.28   | 3.75   |
| Ba                                          | 13.09 | 12.95  | 12.5   | 12.69  | 14.6   | 13.14  | 13.66  | 12.45 | 9.82   | 8.7    | 12.19  | 11.18  | 11.06  | 11.99  |
| Rb                                          | 390   | 377    | 389    | 376    | 374    | 376    | 358    | 370   | 397    | 373    | 356    | 394    | 363    | 341    |
| Cs                                          | 12.24 | 9.83   | 10.66  | 10.78  | 10.97  | 11.15  | 11.08  | 8.15  | 10.35  | 9.18   | 8.45   | 9.78   | 8.8    | 7.49   |
| Th                                          | 71.47 | 71.14  | 90.08  | 103.67 | 99.88  | 65.27  | 86.58  | 66.14 | 84.28  | 71.54  | 85.96  | 62.1   | 72.18  | 70.02  |
| U                                           | 4.26  | 3.93   | 5.12   | 6.22   | 5.54   | 4.15   | 5.63   | 3.83  | 7.65   | 6.27   | 4.17   | 5.18   | 4.25   | 3.93   |
| Nb                                          | 38.8  | 32.52  | 39.29  | 43.65  | 44.09  | 31.43  | 38.4   | 31.46 | 34.48  | 28.71  | 29.41  | 28.01  | 27     | 25.61  |
| Ta                                          | 4.98  | 4.84   | 5.27   | 5.85   | 5.86   | 4.37   | 5.42   | 3.93  | 4.52   | 4.05   | 4.16   | 3.85   | 3.72   | 3.48   |
| Pb                                          | 38.35 | 36.43  | 39.79  | 50.74  | 41.03  | 36.97  | 40.83  | 37.58 | 42.09  | 39.36  | 34.47  | 38.55  | 37.55  | 32.93  |
| Sr                                          | 5.76  | 8.03   | 6.35   | 9.39   | 10.87  | 7.12   | 7.65   | 5.44  | 5.81   | 5.17   | 5.23   | 4.67   | 4.81   | 5.03   |
| Zr                                          | 165   | 250    | 186    | 220    | 223    | 208    | 237    | 139   | 213    | 208    | 128    | 162    | 177    | 159    |
| Hf                                          | 9.99  | 13.56  | 10.11  | 13.84  | 14.07  | 12.33  | 14.48  | 8.16  | 12.33  | 11.89  | 7.13   | 9.16   | 9.89   | 9.14   |
| P                                           | 2187  | 40     | 65     | 76     | 103    | 58     | 53     | 36    | 56     | 47     | 39     | 901    | 53     | 39     |
| Ti                                          | 3283  | 288    | 369    | 302    | 384    | 270    | 350    | 276   | 318    | 282    | 308    | 1440   | 269    | 256    |
| Cr                                          | 4.12  | 2.89   | 4.99   | 5.7    | 1.77   | 1.33   | 3.22   | 3.41  | 2.03   | 1.46   | 1.48   | 2.67   | 1.77   | 2.06   |
| Ni                                          | 1.95  | 1.76   | 2.01   | 2.64   | 0.73   | 0.5    | 1.77   | 1.3   | 0.69   | 0.81   | 0.44   | 0.94   | 0.62   | 0.8    |
| Co                                          | 0.24  | 0.16   | 0.17   | 0.18   | 0.18   | 0.14   | 0.17   | 0.16  | 0.15   | 0.13   | 0.14   | 0.17   | 0.13   | 0.18   |
| V                                           | 0.29  | 0.32   | 0.24   | 0.34   | 0.21   | 0.22   | 0.25   | 0.31  | 0.48   | 0.37   | 0.32   | 0.42   | 0.32   | 0.32   |
| Sc                                          | 7.97  | 7.63   | 8.33   | 8.27   | 8.69   | 7      | 7.99   | 6.3   | 7.82   | 6.95   | 6.05   | 6.29   | 6.26   | 5.9    |
| Ga                                          | 32.85 | 31.6   | 37.15  | 35.76  | 36.01  | 32.64  | 33.51  | 29.13 | 33.48  | 31.72  | 31.92  | 30.15  | 30.88  | 27.37  |
| La                                          | 32.23 | 30.13  | 41.9   | 40.3   | 35.42  | 33.71  | 34.62  | 26.14 | 33.68  | 40     | 42.21  | 25.98  | 29.94  | 25.39  |
| Ce                                          | 83.26 | 77.78  | 109.69 | 102.99 | 91.37  | 87.34  | 90.89  | 67.78 | 88.14  | 106.66 | 110.16 | 66.77  | 78.75  | 66.46  |
| Pr                                          | 10.86 | 10.18  | 14.6   | 13.64  | 12.25  | 11.36  | 11.96  | 8.79  | 11.53  | 13.52  | 14.03  | 8.85   | 10.21  | 8.55   |
| Nd                                          | 43.38 | 40.79  | 57.93  | 55.17  | 50.25  | 45.68  | 48.99  | 35.47 | 47.54  | 53.6   | 53.78  | 35.95  | 41.68  | 34.2   |
| Sm                                          | 13.55 | 13.53  | 18.06  | 17.75  | 17.2   | 14.65  | 16.63  | 11.55 | 15.43  | 16.14  | 15.59  | 11.89  | 13.9   | 10.92  |
| Eu                                          | 0.04  | 0.04   | 0.04   | 0.04   | 0.05   | 0.03   | 0.04   | 0.03  | 0.03   | 0.03   | 0.03   | 0.03   | 0.03   | 0.03   |
| Gd                                          | 16.2  | 16.64  | 21.4   | 20.79  | 22.2   | 17.88  | 21.29  | 14.68 | 19.48  | 18.65  | 16.92  | 14.88  | 17.21  | 13.37  |
| Tb                                          | 2.98  | 3.14   | 3.9    | 3.77   | 4.16   | 3.22   | 4.02   | 2.78  | 3.71   | 3.41   | 3.03   | 2.85   | 3.23   | 2.53   |
| Dy                                          | 19.61 | 20.3   | 25.2   | 24.45  | 28.07  | 20.66  | 26.7   | 18.74 | 25.08  | 22.52  | 19.56  | 19.04  | 21.72  | 16.82  |
| Ho                                          | 4.09  | 4.25   | 5.23   | 5.05   | 5.85   | 4.22   | 5.64   | 3.9   | 5.3    | 4.69   | 3.95   | 3.97   | 4.55   | 3.49   |
| Er                                          | 12.39 | 13.23  | 15.57  | 15.09  | 17.84  | 12.78  | 17.37  | 11.79 | 16.4   | 14.28  | 11.94  | 12.23  | 13.97  | 10.7   |
| Tm                                          | 1.9   | 2.06   | 2.37   | 2.3    | 2.77   | 1.9    | 2.67   | 1.84  | 2.59   | 2.26   | 1.79   | 1.88   | 2.18   | 1.64   |
| Yb                                          | 13.21 | 14.59  | 16.43  | 16.03  | 19.45  | 13.28  | 19.08  | 12.87 | 18.16  | 15.94  | 12.47  | 13.21  | 15.68  | 11.8   |

|    |      |      |      |      |     |      |      |      |      |      |      |      |      |      |
|----|------|------|------|------|-----|------|------|------|------|------|------|------|------|------|
| Lu | 1.86 | 2.04 | 2.27 | 2.27 | 2.7 | 1.86 | 2.67 | 1.79 | 2.54 | 2.24 | 1.73 | 1.87 | 2.18 | 1.64 |
| Y  | 124  | 136  | 161  | 153  | 182 | 131  | 177  | 116  | 156  | 137  | 116  | 117  | 134  | 102  |

**Table S4.** Whole-rock Nd isotopic data for the Duhongshan granites.

| Sample no. | Sm/Nd    | <sup>147</sup> Sm/ <sup>144</sup> Nd | <sup>143</sup> Nd/ <sup>144</sup> Nd | ±2σ      | ( <sup>143</sup> Nd/ <sup>144</sup> Nd) <sub>i</sub> | ε <sub>Nd</sub> ( <i>t</i> ) | T <sub>DM2</sub> (Ma) |
|------------|----------|--------------------------------------|--------------------------------------|----------|------------------------------------------------------|------------------------------|-----------------------|
| DHS-2      | 0.312436 | 0.188775                             | 0.512732                             | 0.000008 | 0.512267                                             | 2.21                         | 1231                  |
| DHS-4      | 0.331767 | 0.200455                             | 0.512743                             | 0.000007 | 0.512249                                             | 1.86                         | 1274                  |
| DHS-7      | 0.321748 | 0.194402                             | 0.512740                             | 0.000006 | 0.512262                                             | 2.11                         | 1244                  |
| DHS-12     | 0.320790 | 0.193823                             | 0.512743                             | 0.000006 | 0.512266                                             | 2.18                         | 1235                  |
| DHS-13     | 0.339417 | 0.205077                             | 0.512753                             | 0.000007 | 0.512248                                             | 1.84                         | 1277                  |
